# Supplementary material for: A designathon to co-create community-driven HIV self-testing services for Nigerian youth: findings from a participatory event
Source: PubMed Central journal article supplement (PMC8166032; doi:10.1186/s12879-021-06212-6), 2021-05-31

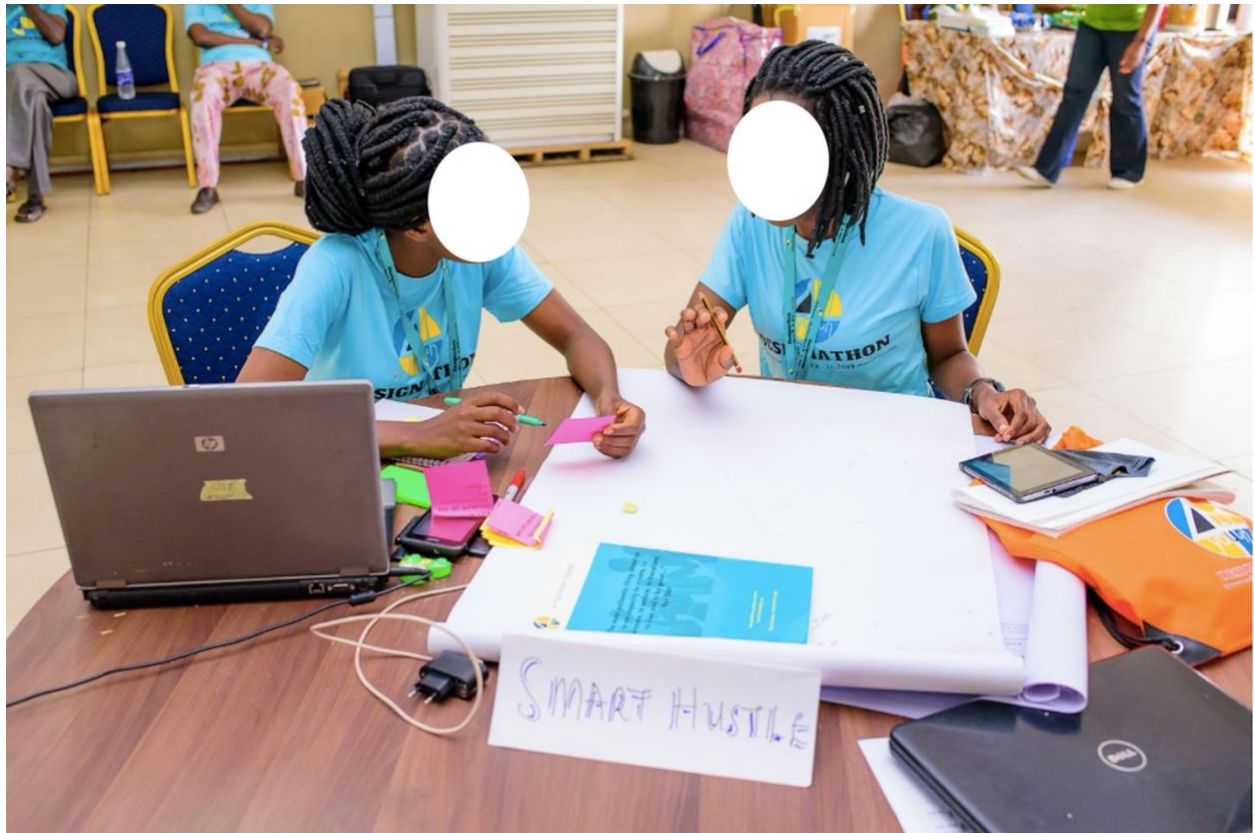

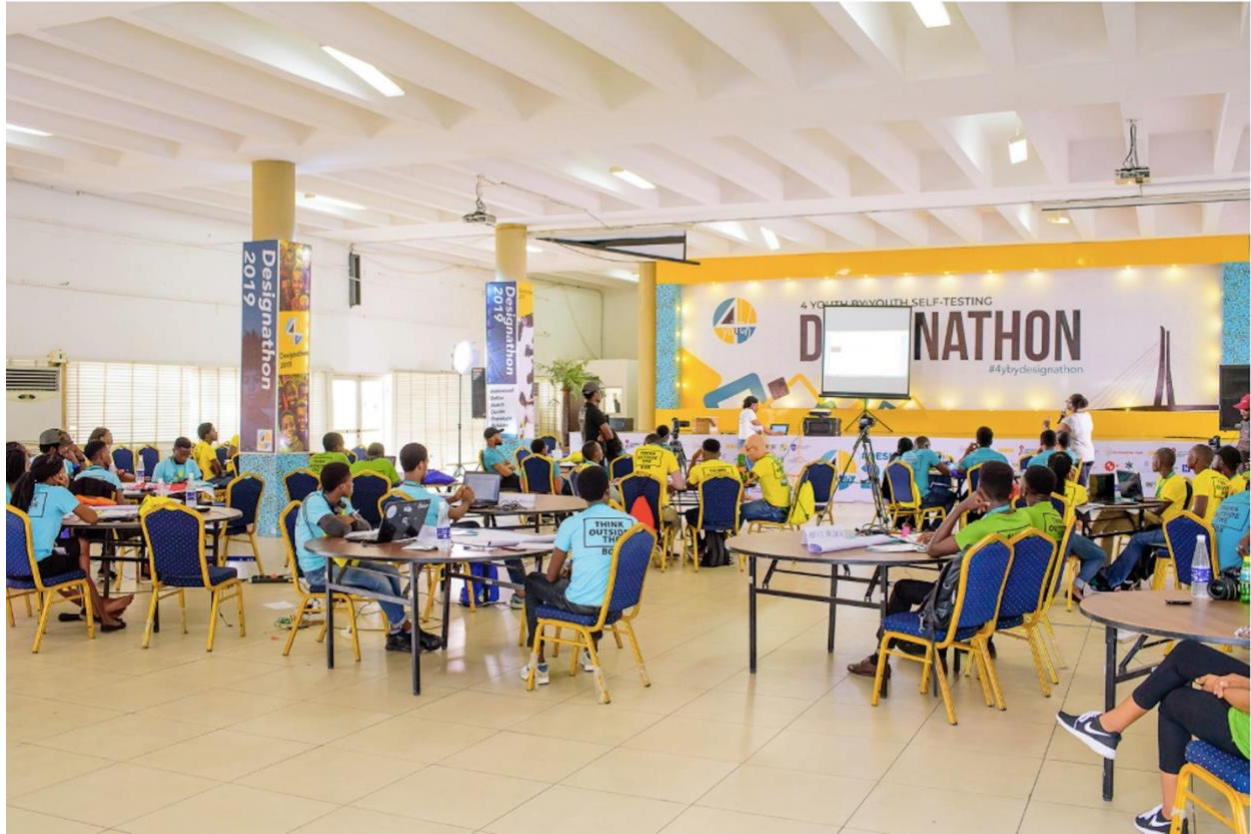

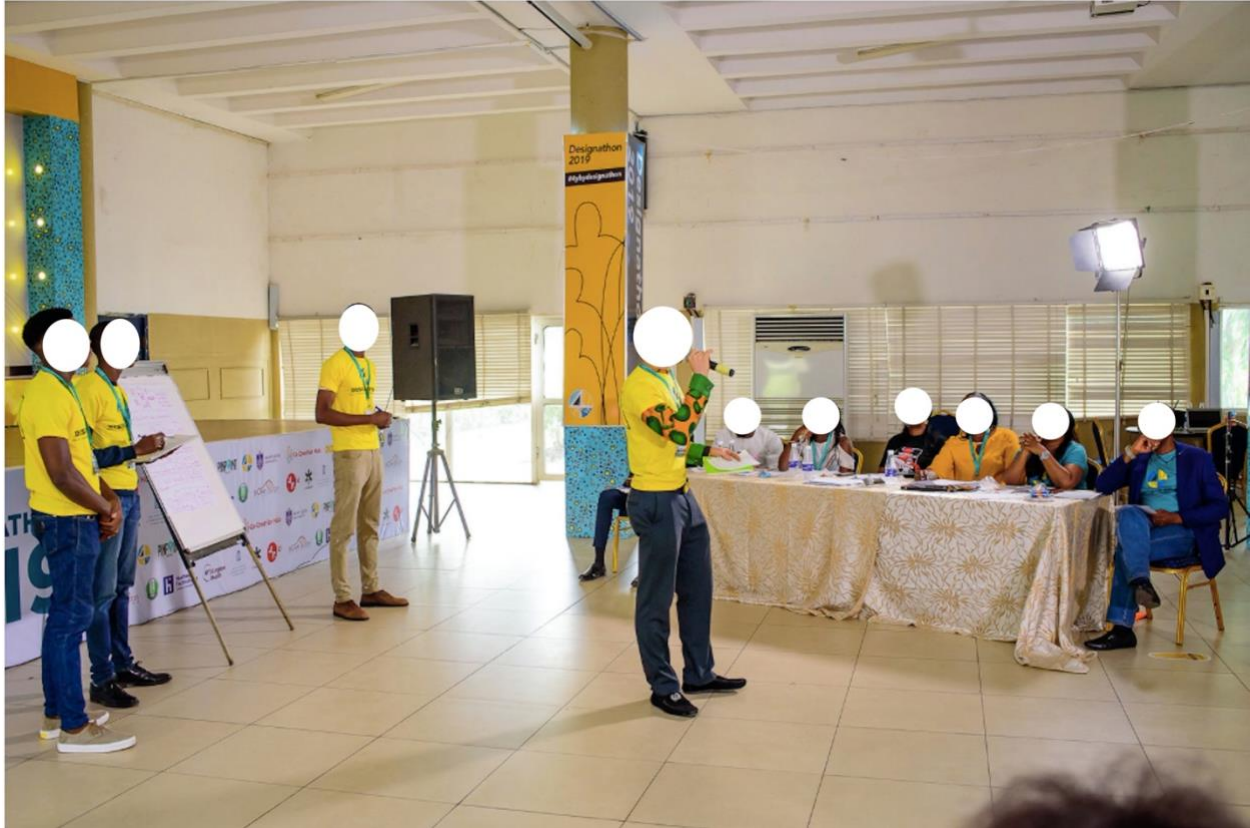

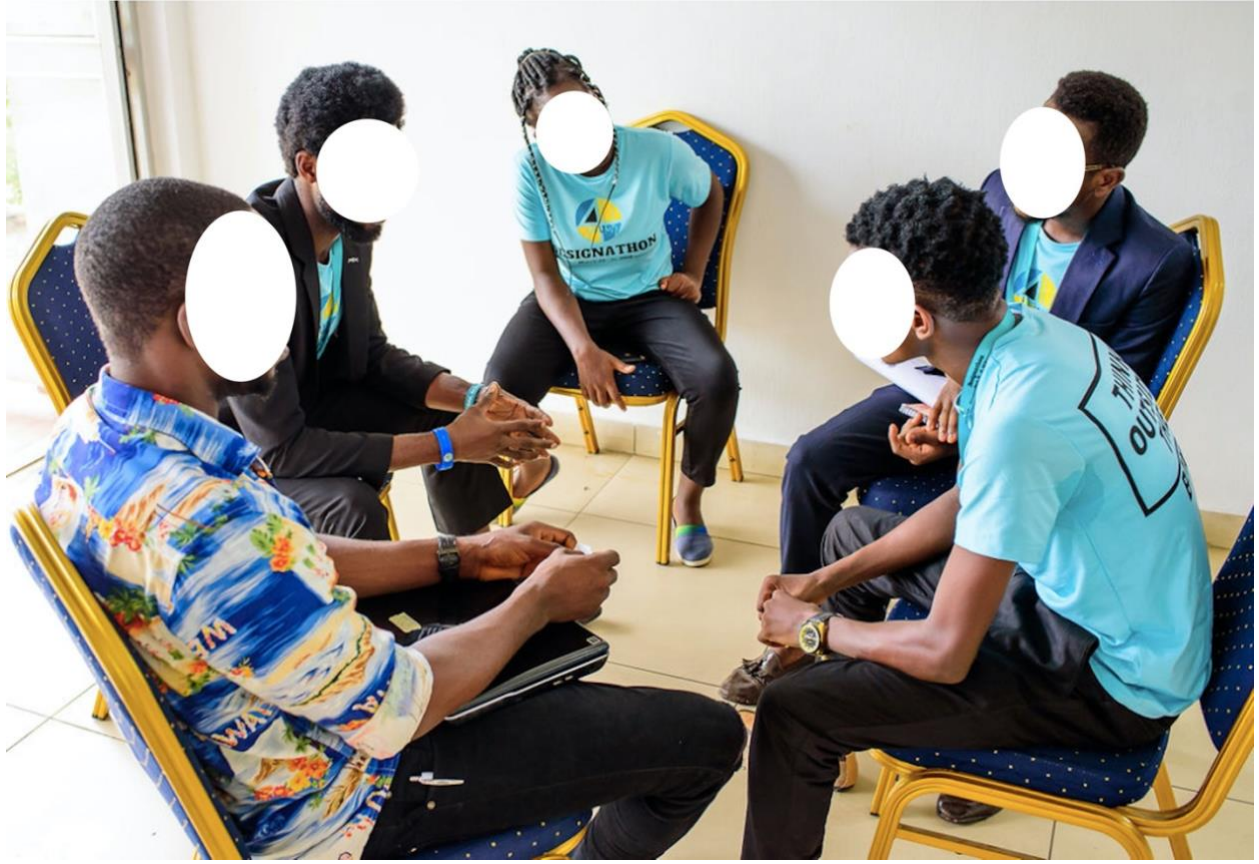

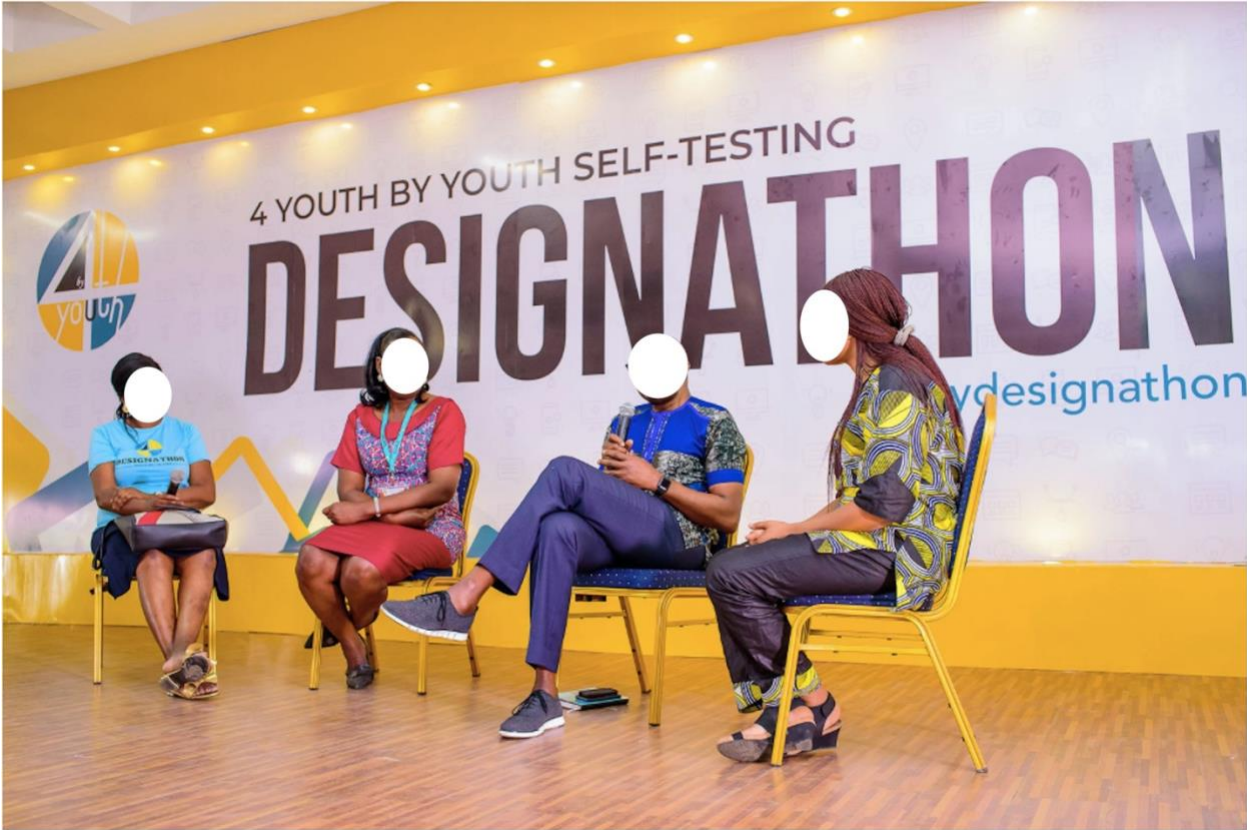

Supplement: 12879_2021_6212_MOESM2_ESM.pdf [file 12879_2021_6212_MOESM2_ESM.pdf]
